# Supplementary material
Source: PubMed Central journal article supplement (PMC6378695)
Supplement: NIHMS1002544-supplement-Appendix.pdf [file NIHMS1002544-supplement-Appendix.pdf]

# Family Medicine

THE OFFICIAL JOURNAL OF THE SOCIETY OF TEACHERS OF FAMILY MEDICINE

## Appendix to:

**Gastala N, Wingrove P, Gaglioti A, Liaw W, Bazemore A. The Growing Trend of Health Coaches in Team-Based Primary Care Training. Fam Med. 2018; 50(7):526-30.**

## CERA SURVEY QUESTIONS

1. **Clinical health coaches** are behavior change specialists who partner with patients to identify health goals and action plans, help patients realize and overcome barriers to change, reinforce physician recommendations and coordinate healthcare.

Do your residents have any exposure to health coaches?

- Yes – all of them
- Yes – some of them
- No - none of them

2. Does your residency program offer residents opportunities to observe or work with health coaches in their continuity clinic?

- Yes
- No

3. Does your program use health coaches for specific populations (select all that apply)?

- Yes - Diabetes
- Yes - Hypertension
- Yes - Obesity
- Yes - Heart Failure
- Yes - Mental Health
- Yes - Pain Management
- No - Health coaches are available to all patients with a health related goal
- N/A - We do not use health coaches

4. Does your residency program offer training for residents on how to work with health coaches as members of the care team?

[Type here]

- Yes
- No

5. Has your residency continuity clinic site been designated a PCMH (Patient-Centered Medical Home) site of recognition by the NCQA (National Committee for Quality Assurance's) or other certifying body?

- Yes, level 1
- Yes, level 2
- Yes, level 3
- We are in the process of applying for recognition
- No

6. Does your residency continuity clinic site carry any of the following designations (check all that apply)?

- Federally Qualified Health Center
- Teaching Health Center for Graduation Medical Education (THC)
- Rural Health Clinic
- Past participant in: Preparing the Personal Physician for Practice (P4)

7. What percentage of your residency clinic site(s)' patient population is covered by an ACO or other population health payment model (your best estimation)?

- <10%
- 10-25%
- 26-50%
- 51-75%
- >75%

8. What is the training background of the health coach(es) (select all that apply)?

- Registered nurse (RN)
- Medical assistant (MA)
- Nursing Assistant (NA)
- Licensed Practical Nurse (LPN)
- Psychologist
- Social Worker
- Trained health coach through a certificate program
- No specific training or clinical background
- N/A - We do not use health coaches

9. If residents do not have access to a health coach currently, do you plan to incorporate health coaches into residency training in the next 1-2 years?

[Type here]

- Yes
- No
- Not Applicable
